# Supplementary material
Source: PubMed Central journal article supplement (PMC3082613)
Supplement: NIHMS270518-supplement-Supp_Fig_S1.pdf [file NIHMS270518-supplement-Supp_Fig_S1.pdf]

**Supp. Figure S1.** Example report. This report was generated using the GeneInsight system.

|                                                                                                                                                                                |                   |                                                                                                              |                        |
|--------------------------------------------------------------------------------------------------------------------------------------------------------------------------------|-------------------|--------------------------------------------------------------------------------------------------------------|------------------------|
|  <b>HARVARD MEDICAL SCHOOL</b>                                                                |                   |  <b>PARTNERS HEALTHCARE</b> |                        |
| <b>Laboratory for Molecular Medicine</b><br><b>Center for Genetics and Genomics</b><br>65 Landsdowne Street, Cambridge MA 02139<br>Phone: (617) 768-8500 – Fax: (617) 768-8513 |                   |                                                                                                              |                        |
|                                                                                                                                                                                |                   | Unit Number(s):                                                                                              | [REDACTED]             |
|                                                                                                                                                                                |                   | Lab Accession:                                                                                               | [REDACTED]             |
|                                                                                                                                                                                |                   | Patient Name:                                                                                                | [REDACTED]             |
|                                                                                                                                                                                |                   | Birth Date:                                                                                                  | [REDACTED]             |
|                                                                                                                                                                                |                   | Age Sex:                                                                                                     | [REDACTED] Page 1 of 6 |
| <b>MOLECULAR DIAGNOSTICS REPORT</b>                                                                                                                                            |                   |                                                                                                              |                        |
| Specimen Type:                                                                                                                                                                 | Blood, Peripheral | Report Date:                                                                                                 | [REDACTED]             |
| Related Accession(s):                                                                                                                                                          | [REDACTED]        | Received Date:                                                                                               | [REDACTED]             |
| Referring Physician:                                                                                                                                                           | [REDACTED]        | Referring Facility:                                                                                          | [REDACTED]             |
| Copies To:                                                                                                                                                                     | [REDACTED]        | Referring Fac. MRN:                                                                                          | [REDACTED]             |
|                                                                                                                                                                                |                   | Lab Control Number:                                                                                          | [REDACTED]             |

**TEST PERFORMED** - Cxn-pnlA; Oto-pnlA

**TEST DESCRIPTION** - Connexin Test (GJB2 Sequencing and GJB6-D13S1830 Deletion)  
OtoChip for Hearing Loss and Usher Syndrome (19 Genes Sequenced)

**INDICATION FOR TEST** - Congenital profound sensorineural hearing loss with hypothyroidism and a family history of hearing loss

**RESULTS**

**DNA VARIANTS:**

Heterozygous c.1001+1G>A, Intron 8, SLC26A4, Pathogenic  
Heterozygous c.2188C>T (p.Gln730X), Exon 19, SLC26A4, Pathogenic

**INTERPRETATION:**

**Positive.**

**OtoChip Test: Positive.** DNA sequencing of 19 genes associated with hearing loss and related syndromes identified the variants listed above. No clinically significant variants were detected in the other 17 genes. See Methodology below for information on the specific genes and regions sequenced.

The **1001+1G>A** variant has been previously described in the literature with well established pathogenicity (Coyle 1998, Campbell 2001, Bogazzi 2000, Lopez-Bigas 2001, Fugazzola 2002, Bogazzi 2004, Pryor 2005). This variant is predicted to cause abnormal splicing because the nucleotide substitution occurs in the invariant region of the splice consensus sequence.

The **Gln730X** variant in SLC26A4 has not been reported in the literature nor previously identified by our laboratory. However, this variant leads to a premature stop codon at position 730, which is predicted to lead to a truncated or absent protein. Therefore, this variant meets our criteria to be classified as pathogenic.

In summary, it is highly likely that this individual's hearing loss and hypothyroidism are due to the 1001+1G>A and Gln730X SLC26A4 variants. Although there are no reports of these variants occurring in cis (on the same copy of the gene), testing of parental DNA would be needed to confirm that both copies of the gene are affected and no normal copy of the gene exists.

[REDACTED]

Center for Genetics and Genomics  
Laboratory for Molecular Medicine

Accession: [REDACTED]  
Patient Name: [REDACTED]

Page 2 of 6

## MOLECULAR DIAGNOSTICS REPORT

---

Pendred syndrome and DFNB4 hearing loss are inherited in an autosomal recessive manner. Two carriers have a 25% (or 1 in 4) risk for having an affected child.

**Connexin Test (GJB2 sequencing and GJB6-D13S1830 deletion): Negative.** DNA sequencing of exon 1, the coding region of exon 2 and all splice junctions did not identify any clinically significant variants in GJB2 (Connexin 26). A PCR-based analysis of the GJB6-D13S1830 region of chromosome 13 was performed and did not detect the deletion.

### RECOMMENDATION:

Testing of parents is recommended to assess for cis/trans configuration of the SLC26A4 variants in this individual.

Genetic counseling is recommended for this individual and their family members. Familial mutation testing is available for other family members if desired. For assistance in locating genetic counseling services or disease specialists please call the laboratory at 617-768-8500 or email at LMM@partners.org

### COMMENTS:

Common sequence variants of unlikely clinical significance are not included in this report but are available upon request.

In addition, the following less common sequence variants have been identified. Although they are likely benign we cannot rule out that they may be pathogenic.

Vall1734Met in exon 41 of CDH23: This variant has not been reported in the literature nor previously identified by our laboratory. Computational analyses (biochemical amino acid properties, homology, PolyPhen, SIFT, AlignGVGD) do not provide strong support for pathogenicity. In addition, this patient already has two pathogenic variants which sufficiently explain their hearing loss. In summary, this data suggests this variant is more likely benign.

Asp2936Asp in exon 61 of CDH23: This variant is not expected to have clinical significance because it does not alter an amino acid residue and is not located near a splice junction.

-6T>A in exon 2 of GJB2: This variant has been reported in the literature and is likely benign due to equal occurrence in cases and controls. It was found in 3 of 144 Black control chromosomes (Tang 2006) and 3 of 418 proband chromosomes from multiple or unspecified races (Tang 2006, Al-Qahtani, 2010, Shan 2010).

Thr2523Thr in exon 33 of GPR98: This variant is not expected to have clinical significance because it does not alter an amino acid residue and is not located near a splice junction.

Glu994Glu in exon 28 of MYO6: This variant is not expected to have clinical significance because it does not alter an amino acid residue and is not located near a splice junction. In addition, this variant has been reported as benign and is seen in an equal frequency in probands (1/50) and controls (3/120) (Ahituv 2000, rs55905349).

Ala918Ala in exon 23 of MYO7A: This variant is not expected to have clinical significance because it does not alter an amino acid residue and is not located near a splice junction.

Pro1341Pro in exon 31 of MYO7A: This variant is not expected to have clinical significance because it does not alter an amino acid residue, is not located near a

Center for Genetics and Genomics  
Laboratory for Molecular Medicine

Accession: [REDACTED]  
Patient Name: [REDACTED]

Page 3 of 6

## MOLECULAR DIAGNOSTICS REPORT

---

splice junction and is listed in dbSNP in 2/50 chromosomes (rs73495790). In addition, this variant has previously been reported as benign because it was identified at a similar frequency in affected individuals (1/40) and in control subjects (1/28) (Jaijo 2007).

Ala357Thr in exon 9 of SLC26A4: This variant has not been reported in the literature nor previously identified by our laboratory. This residue is not highly conserved in mammals and computational analyses (PolyPhen, SIFT, AlignGVGD) do not suggest a high likelihood of impact to the protein. In addition, this patient already has two pathogenic variants which sufficiently explain their hearing loss. In summary, this data suggests this variant is more likely benign.

Val217Val in exon 8 of USH1C: This variant is not expected to have clinical significance because it does not alter an amino acid residue and is not located near a splice junction.

Lys130Glu in exon 2 of USH1G: This variant is not expected to have clinical significance due to an equal occurrence in probands (1/109) and controls (1/100) (Aller 2007).

Glu142Lys in exon 2 of USH1G: This variant is not expected to have clinical significance due to an equal occurrence in probands (1/109) and controls (1/100) (Aller 2007).

Cys2123Cys in exon 33 of USH2A: This variant is not expected to have clinical significance because it does not alter an amino acid residue and is not located near a splice junction.

### INCIDENTAL VARIANTS:

Heterozygous c.5200G>A (p.Val11734Met), Exon 41, CDH23, Likely Benign  
Heterozygous c.8808C>T (p.Asp2936Asp), Exon 61, CDH23, Likely Benign  
Heterozygous c.-6T>A (5'UTR), Intron 1, GJB2, Likely Benign  
Heterozygous c.7569A>G (p.Thr2523Thr), Exon 33, GPR98, Likely Benign  
Heterozygous c.2982G>A (p.Glu994Glu), Exon 28, MYO6, Likely Benign  
Heterozygous c.2754C>T (p.Ala918Ala), Exon 23, MYO7A, Likely Benign  
Heterozygous c.4023C>T (p.Pro1341Pro), Exon 31, MYO7A, Likely Benign  
Heterozygous c.1069G>A (p.Ala357Thr), Exon 9, SLC26A4, Likely Benign  
Heterozygous c.651A>G (p.Val217Val), Exon 8, USH1C, Likely Benign  
Heterozygous c.388A>G (p.Lys130Glu), Exon 2, USH1G, Likely Benign  
Heterozygous c.424G>A (p.Glu142Lys), Exon 2, USH1G, Likely Benign  
Heterozygous c.6369C>T (p.Cys2123Cys), Exon 33, USH2A, Likely Benign

### TEST INFORMATION

#### BACKGROUND:

Over 50% of isolated childhood hearing loss has a genetic etiology, with over 50 genes involved. Hereditary hearing loss is most commonly inherited in an autosomal recessive pattern, however, some genes are inherited in autosomal dominant, X-linked, or mitochondrial pattern. For specific information the genetics of nonsyndromic hearing loss please see our website (<http://www.hpcgg.org/LMM>) or Smith and Camp (2007). Usher syndrome is a condition characterized by sensorineural hearing loss, retinitis pigmentosa and variable vestibular dysfunction. At least 9 identified genes are responsible for the three clinical subtypes. Some of these genes can also cause isolated hearing loss. Usher syndrome is inherited in an autosomal recessive pattern.

Center for Genetics and Genomics  
Laboratory for Molecular Medicine

Accession: [REDACTED]  
Patient Name: [REDACTED]

Page 4 of 6

## MOLECULAR DIAGNOSTICS REPORT

---

For additional information on Usher syndrome please see our website (<http://www.hpcgg.org/LMM>) or Keats and Lentz (2008) for Type 1, Keats and Lentz (2007) for Type 2, or Cohen (2007) for Type 3.

### METHODOLOGY:

For the Connexin Test exon 1 and the coding region of exon 2 of the connexin 26 (GJB2) gene (NM\_004004) are amplified using flanking primer sets. PCR products are sequenced using an ABI fluorescence automatic DNA sequencer. This test does not detect large deletions or mutations in non-coding regions that could affect gene expression. This assay is greater than 99.9% accurate in detecting mutations in the sequences analyzed. Polymerase chain reaction (PCR) analysis is performed to detect the presence or absence of a deletion spanning the GJB6-D13S1830 region of chromosome 13.

The OtoChip test is performed by a combination of oligonucleotide hybridization-based DNA sequencing and dideoxy-based DNA sequencing of the coding regions and splice sites of CDH23 (NM\_022124.2), CLRN1 (NM\_174878.2, NM\_174880.1, NM\_052995.2), DFNB31 (NM\_015404.1), exon 2 (excludes 35delG) of GJB2 (NM\_004004) plus the -3202+1G>A exon 1 splice site variant, exon 3 of GJB6 (Connexin 30) (NM\_006783.4), exons 8, 20, 31-41 and 89 of GPR98 (NM\_032119.3), exons 2-35 of MYO6 (NM\_004999.3), exons 2-49 of MYO7A (NM\_000260), OTOF (NM\_194248.1) with 2 exons from alternative transcripts (NM\_194323.1 and AF183183), exons 2-33 of PCDH15 (NM\_033056.3), SLC26A4 (NM\_000441.1) plus the -103T>C exon 1 variant, exons 5-24 of TM61 (NM\_138691.2), TMIE (NM\_147196.1), exons 2-13 of TMPRSS3 (NM\_024022.1), USH1C (NM\_153676.2) with 1 exon from an alternative transcript (NM\_005709.2), USH1G (NM\_173477.2), USH2A (NM\_206933.1 and NM\_007123.4), and MTT51 as well as genotyping of mutations 961delT, 961T>C, 961T>G, 1095T>C, 1494T>C, 1555A>G in MTRNR1.

The OtoChip is at least 97% sensitive for detecting substitution variants in the sequence analyzed. This test does not examine most non-coding regions that could affect gene expression. Compared to dideoxy sequencing this test has significantly reduced sensitivity (37%) for detecting small insertions and deletions (indels), except for 281 previously identified indels for which genotyping probes have been included. These indels can be detected at 95% sensitivity. Like traditional sequencing tests, the OtoChip has very little sensitivity for detecting large deletions, insertions and other copy number changes.

These tests were developed and the performance characteristics determined by the Laboratory for Molecular Medicine at the Partners Healthcare Center for Personalized Genetic Medicine (LMM, 65 Landsdowne St, Cambridge, MA 02139; 617-768-8500; CLIA#22D1005307). It has not been cleared or approved by the U.S Food and Drug Administration (FDA). The FDA has determined that such clearance or approval is not necessary.

Variants are reported according to HGVS nomenclature ([www.hgvs.org/mutnomen](http://www.hgvs.org/mutnomen)).

### REFERENCES:

- Ahituv N, Sobe T, Robertson NG, Morton CC, Taggart RT, Avraham KB. 2000. Genomic structure of the human unconventional myosin VI gene. *Gene*. 261(2):269-75.
- Al-Qahtani MH, Baghlab I, Chaudhary AG, Abuzenadah AM, Bamanie A, Daghistani KJ, Safieh M, Fida L, Dallol A. 2010. Spectrum of GJB2 mutations in a cohort of nonsyndromic hearing loss cases from the Kingdom of Saudi Arabia. *Genet Test Mol Biomarkers*. 14(1):79-83.

Center for Genetics and Genomics  
Laboratory for Molecular Medicine

Accession: [REDACTED]  
Patient Name: [REDACTED]

Page 5 of 6

### MOLECULAR DIAGNOSTICS REPORT

---

Aller E, Jaijo T, Beneyto M, Nájera C, Morera C, Pérez-Garrigues H, Ayuso C, Millán J. 2007. Screening of the USH1G gene among Spanish patients with Usher syndrome. Lack of mutations and evidence of a minor role in the pathogenesis of the syndrome. *Ophthalmic Genet.* 28(3):151-5.

Bogazzi F, Raggi F, Ultimieri F, Campomori A, Cosci C, Berrettini S, Neri E, La Rocca R, Ronca G, Martino E, Bartalena L. 2000. A novel mutation in the pendrin gene associated with Pendred's syndrome. *Clin Endocrinol (Oxf).* 52(3):279-85.

Bogazzi F, Russo D, Raggi F, Ultimieri F, Berrettini S, Forli F, Grasso L, Ceccarelli C, Mariotti S, Pinchera A, Bartalena L, Martino E. 2004. Mutations in the SLC26A4 (pendrin) gene in patients with sensorineural deafness and enlarged vestibular aqueduct. *J Endocrinol Invest.* 27(5):430-5.

Calvo J, Rabionet R, Gasparini P, Estivill X. *Connexins and Deafness Homepage.*  
<http://davinci.crg.es/deafness>

Campbell C, Cucci RA, Prasad S, Green GE, Edeal JB, Galer CE, Karniski LP, Sheffield VC, Smith RJ. 2001. Pendred syndrome, DFNB4, and PDS/SLC26A4 identification of eight novel mutations and possible genotype-phenotype correlations. *Hum Mutat.* 17(5):403-11.

Coyle B, Reardon W, Herbrick JA, Tsui LC, Gausden E, Lee J, Coffey R, Grueters A, Grossman A, Phelps PD, Luxon L, Kendall-Taylor P, Scherer SW, Trembath RC. 1998. Molecular analysis of the PDS gene in Pendred syndrome. *Hum Mol Genet.* 7(7):1105-12.

Fugazzola L, Cerutti N, Mannavola D, Crino A, Cassio A, Gasparoni P, Vannucchi G, Beck-Peccoz P. 2002. Differential diagnosis between Pendred and pseudo-Pendred syndromes: clinical, radiologic, and molecular studies. *Pediatr Res.* 51(4):479-84.

Gasmelseed NM, Schmidt M, Magzoub MM, Macharia M, Elmustafa OM, Ototo B, Winkler E, Ruge G, Horstmann RD, Meyer CG. 2004. Low frequency of deafness-associated GJB2 variants in Kenya and Sudan and novel GJB2 variants. *Hum Mutat.* 23(2):206-7.

Jaijo T, Aller E, Beneyto M, Najera C, Graziano C, Turchetti D, Seri M, Ayuso C, Baiget M, Moreno F, Morera C, Perez-Garrigues H, Millan JM. 2007. MYO7A mutation screening in Usher syndrome type I patients from diverse origins. *J. Med. Genet.* 44(3):e71.

Keats BJB, Lentz J. Usher Syndrome Type I (Updated May 28, 2009) In: *GeneReviews at GeneTests: Medical Genetics Information Resource (database online).*  
<http://www.genetests.org>

Keats BJB, Lentz J. Usher Syndrome Type II (Updated April 14, 2009) In: *GeneReviews at GeneTests: Medical Genetics Information Resource (database online).*  
<http://www.genetests.org>

Kothiyal P, Cox S, Ebert J, Husami A, Kenna MA, Greinwald JH, Aronow BJ, Rehm HL. 2010. High-throughput detection of mutations responsible for childhood hearing loss using resequencing microarrays. *BMC Biotechnol.* 10:10.

Pryor SP, Madeo AC, Reynolds JC, Sarlis NJ, Arnos KS, Nance WE, Yang Y, Zalewski CK, Brewer CC, Butman JA, Griffith AJ. 2005. SLC26A4/PDS genotype-phenotype correlation in hearing loss with enlargement of the vestibular aqueduct (EVA): evidence that Pendred syndrome and non-syndromic EVA are distinct clinical and genetic entities. *J. Med. Genet.* 42(2):159-65.

Center for Genetics and Genomics  
Laboratory for Molecular Medicine

Accession: [REDACTED]  
Patient Name: [REDACTED]

Page 6 of 6

---

**MOLECULAR DIAGNOSTICS REPORT**

---

Shan J, Chobot-Rodd J, Castellanos R, Babcock M, Shanske A, Parikh SR, Morrow BE, Samanich J. 2010. GJB2 mutation spectrum in 209 hearing impaired individuals of predominantly Caribbean Hispanic and African descent. *Int. J. Pediatr. Otorhinolaryngol.* 74(6):611-8.

Smith RJH, Camp GV. Deafness and Hereditary Hearing Loss (Updated Dec 2, 2008) In: GeneReviews at GeneTests: Medical Genetics Information Resource (database online). <http://www.genetests.org>

Tang HY, Fang P, Ward PA, Schmitt E, Darilek S, Manolidis S, Oghalai JS, Roa BB, Alford RL. 2006. DNA sequence analysis of GJB2, encoding connexin 26: observations from a population of hearing impaired cases and variable carrier rates, complex genotypes, and ethnic stratification of alleles among controls. *Am J Med Genet A.* 140(22):2401-15.

Tsakamoto K, Suzuki H, Harada D, Namba A, Abe S, Usami S. 2003. Distribution and frequencies of PDS (SLC26A4) mutations in Pendred syndrome and nonsyndromic hearing loss associated with enlarged vestibular aqueduct: a unique spectrum of mutations in Japanese. *Eur J Hum Genet.* 11(12):916-22.

[REDACTED]
